# Supplementary material
Source: publisher site journal article supplement (https://www.spandidos-publications.com/4128/downloadSupplementary)
Supplement: Supplementary file 1 [file downloadSupplementary]

**Table SI. Profile of canine hemangiosarcoma cases in the present study (n=19).**

| Case | Dog breed           | Age | Sex            | Histology                                  | PIK3CA mutation |
|------|---------------------|-----|----------------|--------------------------------------------|-----------------|
| 1    | Golden Retriever    | 9   | Castrated male | Hemangiosarcoma in the spleen              | —               |
| 2    | Shih Tzu            | 15  | Intact male    | Hemangiosarcoma in the spleen              | —               |
| 3    | Mixed               | 9   | Intact male    | Hemangiosarcoma in the spleen              | —               |
| 4    | Mixed               | 10  | Intact male    | Hemangiosarcoma in the spleen              | —               |
| 5    | Mixed               | 14  | Intact male    | Hemangiosarcoma in spleen and ovary (left) | —               |
| 6    | Beagle              | 13  | Spayed female  | Hemangiosarcoma in the spleen              | —               |
| 7    | Mixed               | 9   | Spayed female  | Hemangiosarcoma in the spleen              | H1047R          |
| 8    | Miniature Schnauzer | 12  | Intact male    | Hemangiosarcoma in the spleen              | —               |
| 9    | Golden Retriever    | 13  | Spayed female  | Hepatic hemangiosarcoma                    | H1047L          |
| 10   | Miniature Schnauzer | 11  | Spayed female  | Hemangiosarcoma in the spleen              | —               |
| 11   | Miniature           | 10  | Castrated      | Hepatic                                    | —               |

|    |                          |    |                   |                                                                              |   |
|----|--------------------------|----|-------------------|------------------------------------------------------------------------------|---|
|    | Dachshund                |    | male              | hemangiosarcoma                                                              |   |
| 12 | Border Collie            | 14 | Intact<br>female  | Hemangiosarcoma and<br>follicular lymphoid<br>hyperplasia in the<br>spleen   | — |
| 13 | Labrador<br>Retriever    | 12 | Spayed<br>female  | Hemangiosarcoma in<br>the spleen                                             | — |
| 14 | Flat-Coated<br>Retriever | 10 | Spayed<br>female  | Splenic<br>hemangiosarcoma and<br>its dissemination to the<br>omentum        | — |
| 15 | Beagle                   | 13 | Castrated<br>male | Hemangiosarcoma and<br>arteriolar<br>atherosclerosis                         | — |
| 16 | Miniature<br>Dachshund   | 11 | Intact<br>male    | Hemangiosarcoma and<br>myelolipoma                                           | — |
| 17 | French Bulldog           | 10 | Spayed<br>female  | Hemangiosarcoma in<br>the spleen and its<br>metastases to the<br>lymph nodes | — |
| 18 | Welsh Corgi              | 10 | Castrated<br>male | Hemangiosarcoma in<br>the spleen and its<br>dissemination to the<br>omentum  | — |

|                                                                                               |     |    |                |                                                                |   |
|-----------------------------------------------------------------------------------------------|-----|----|----------------|----------------------------------------------------------------|---|
| 19                                                                                            | Pug | 12 | Castrated male | Hemangiosarcoma and nodular lymphoid hyperplasia in the spleen | — |
| PIK3CA, p110 $\alpha$ phosphatidylinositol-4,5-bisphosphate 3-kinase catalytic subunit alpha. |     |    |                |                                                                |   |
